# Supplementary material for: Low temperature NH3-SCR performance and mechanism of Mn and Fe supported CeCO3F-monazite catalysts
Source: Royal Society of Chemistry journal article supplement (doi:10.1039/d1ra05435j), 2021-01-01
Supplement: d1ra05435j1.pdf [file d1ra05435j1.pdf]

## Catalyst desorption performance

In order to study the number of acid sites in the catalyst and its acid strength, the catalyst was characterized by  $\text{NH}_3$ -TPD. The desorption peak in the TPD curve corresponds to the acidic sites on the catalyst surface. It can be seen from Figure that the three catalysts all have ammonia desorption peaks at  $125^\circ\text{C}$ - $550^\circ\text{C}$ . According to literature reports, usually  $\text{NH}_3$  binds to Brønsted acid sites and weak Lewis acid sites and desorbs before  $200^\circ\text{C}$ . The desorption peak in the range of  $400^\circ\text{C}$  is caused by the desorption of ammonia at the moderately acidic position.

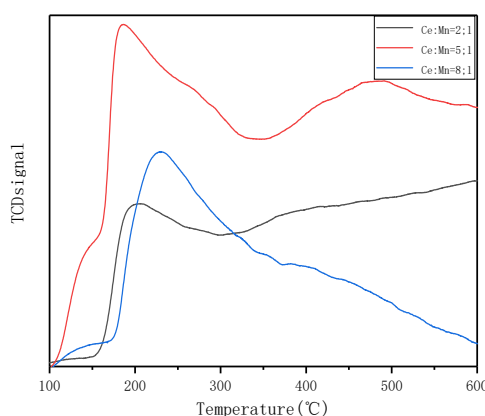

$\text{NH}_3$ -TPD graph with different Mn loads

### $\text{NH}_3$ -TPD Suction and desorption curve peak area

| In varying proportions                 | Ce: Mn=2: 1 | Ce: Mn=5: 1 | Ce: Mn=8: 1 |
|----------------------------------------|-------------|-------------|-------------|
| Peak temperature( $T/^\circ\text{C}$ ) | 198、402     | 180、475     | 236、410     |
| Peak area                              | 65.24       | 136.90      | 72.38       |

The peak at  $500^\circ\text{C}$  is It is caused by the combination of ammonia and strong Lewis acid sites[16-17]. The position of the desorption peak reflects the strength of the acid site of the catalyst, and the peak area reflects the amount of ammonia adsorbed. It can be seen from the figure that when only Mn is loaded, the difference in the position and height of the catalyst peaks of different proportions is not only due to the difference in the loading amount. It may also be caused by changes in the thermal stability of adsorbed  $\text{NH}_3$  substances[18]. From the figure, it can be seen that the catalyst with the ratio of Ce to Mn of 5:1 has the largest amount of ammonia adsorption and the most acid sites. It can be seen from Table 3 that the peak area is the largest and the desorption temperature is relatively low. The peak at  $180^\circ\text{C}$  is attributed to the desorption of the weakly adsorbed  $\text{NH}_3$  from the Brønsted acid site and the desorption of the Lewis acid site. The peak at  $475^\circ\text{C}$  is attributed to the strong adsorption of

strongly adsorbed  $\text{NH}_3$  at Brønsted acid sites and Lewis acid sites. The results of  $\text{NH}_3$ -TPD can also confirm that Ce: Mn=5:1 is the best load.
